# Supplementary material for: Aurora B inhibitors promote RB hypophosphorylation and senescence independent of p53-dependent CDK2/4 inhibition
Source: PubMed Central journal article supplement (PMC11550316; doi:10.1038/s41419-024-07204-5), 2024-11-09

Figure 4A

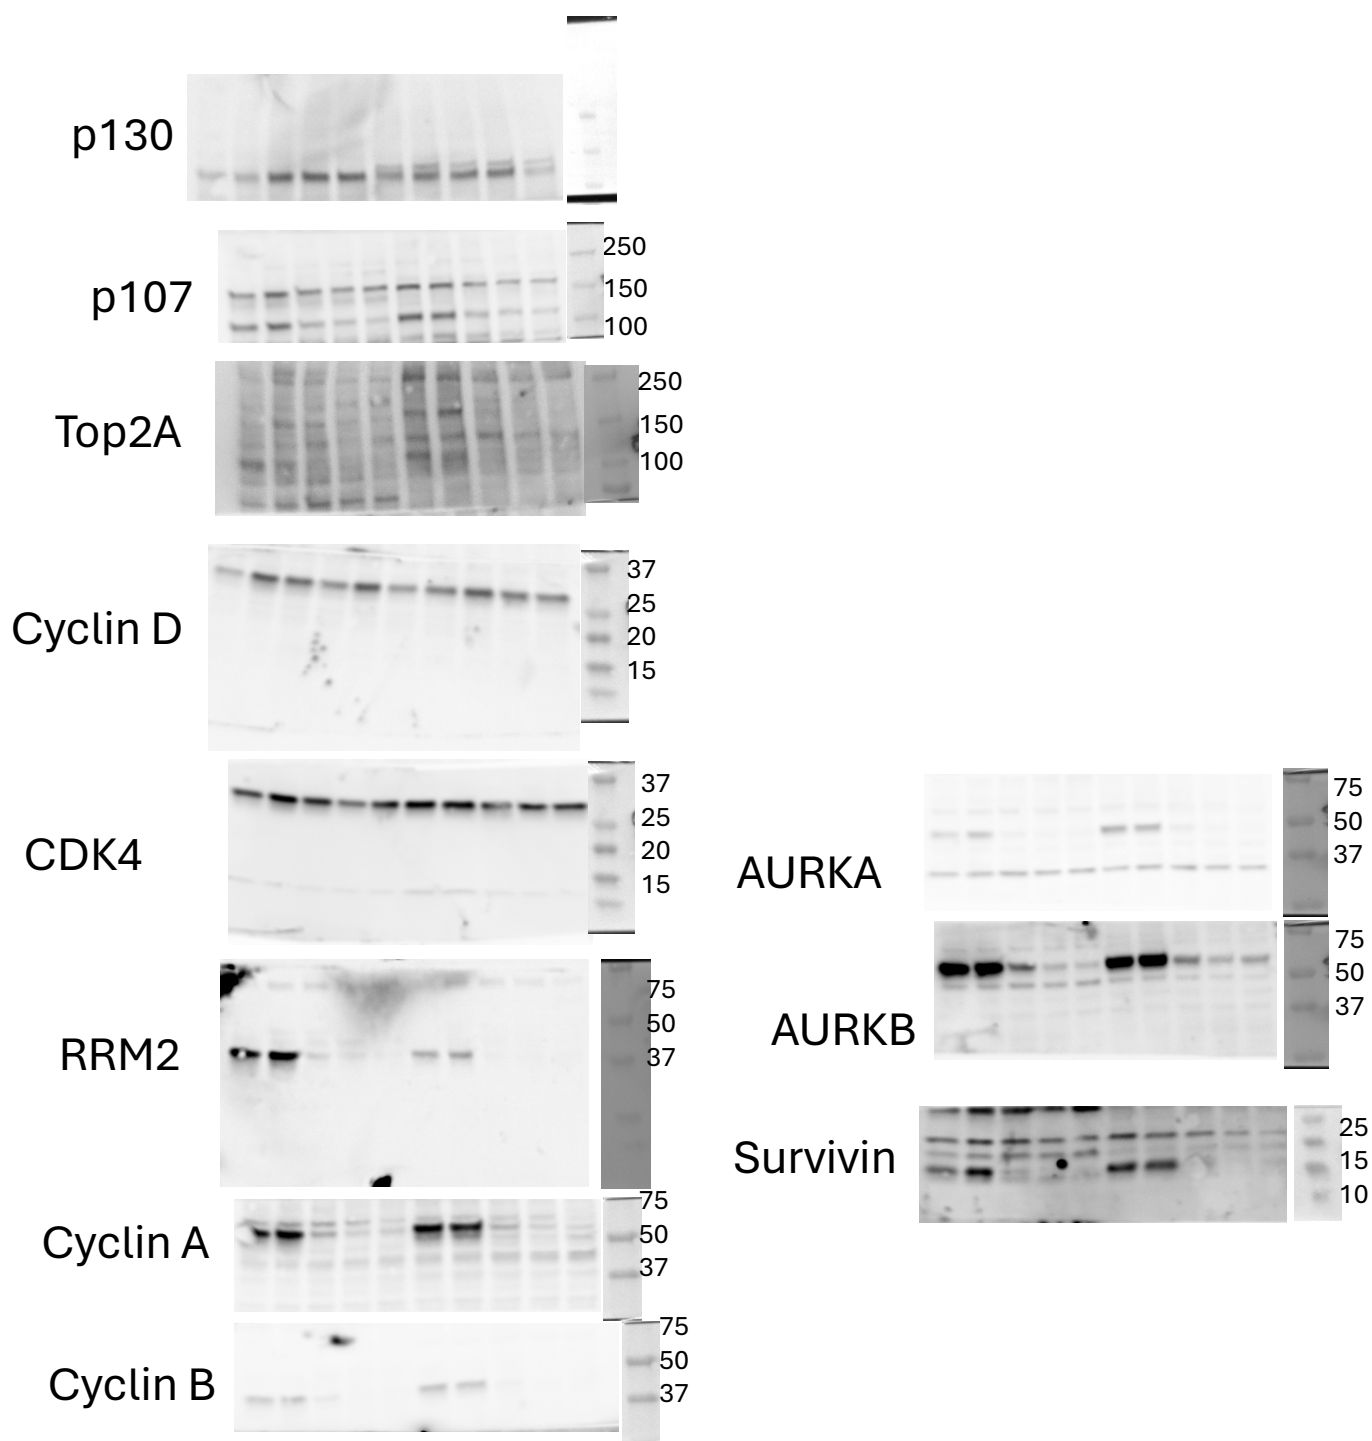

Figure 4C

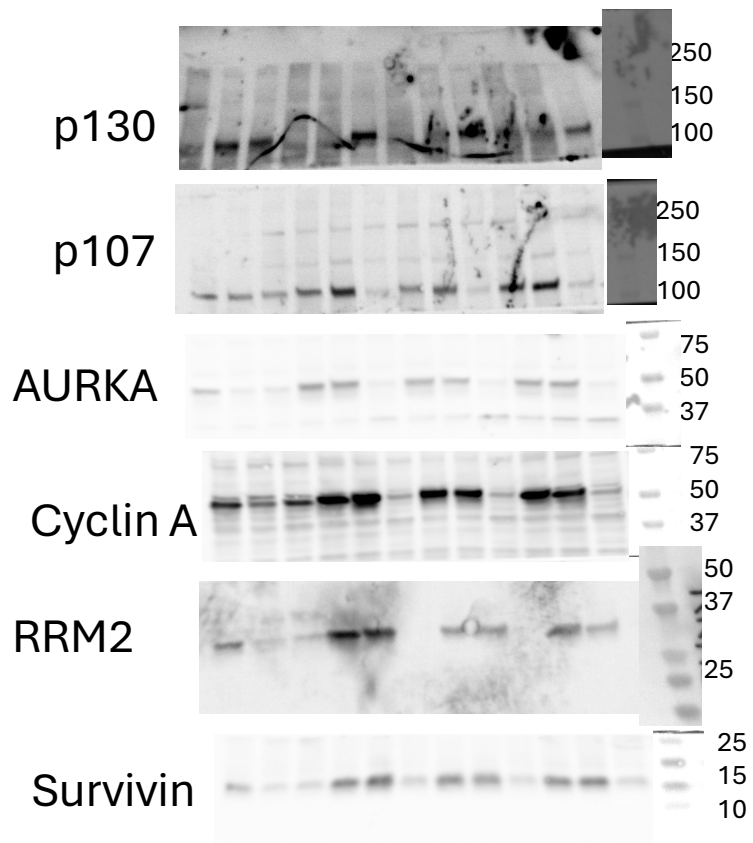

Figure 4E

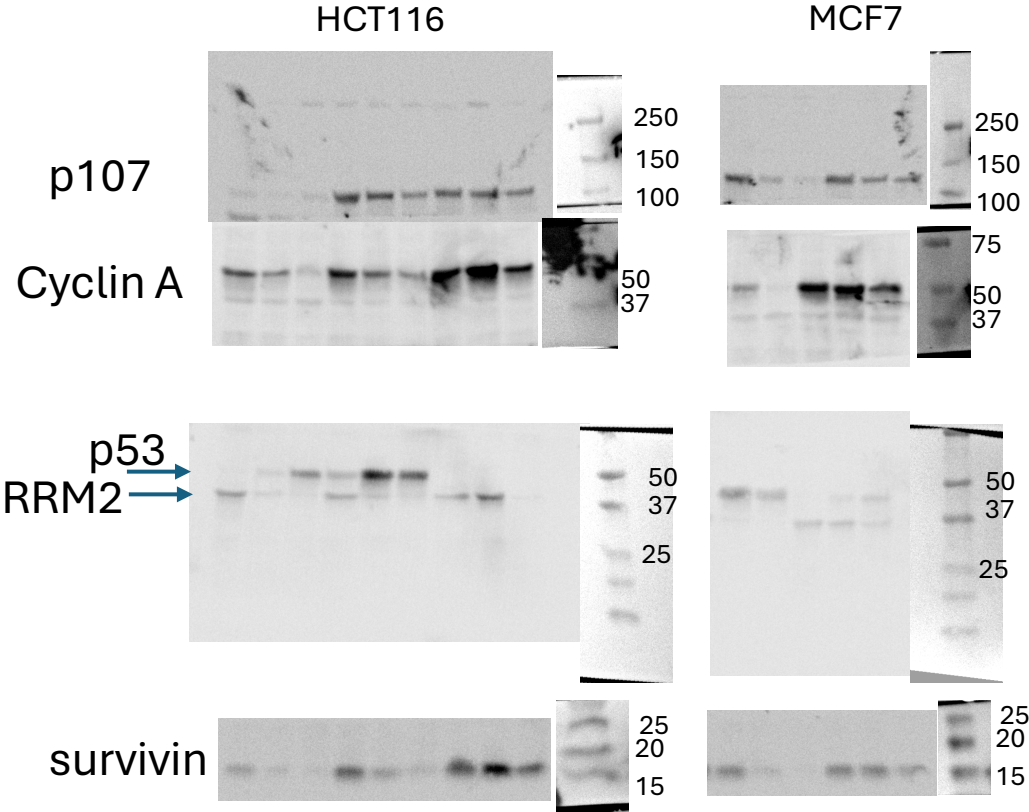

Figure 5A

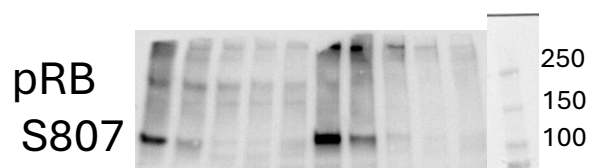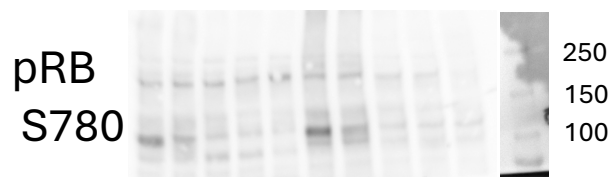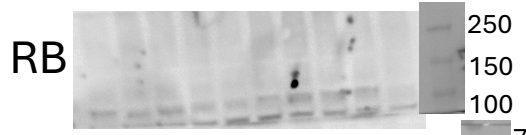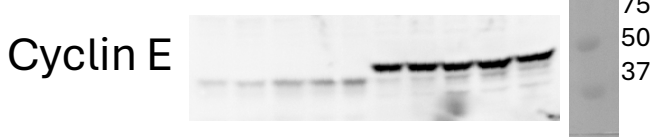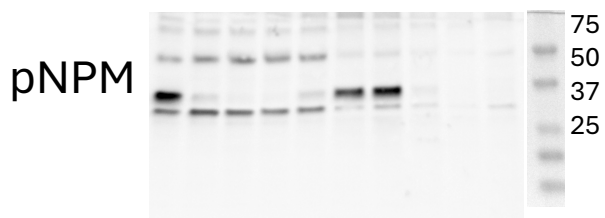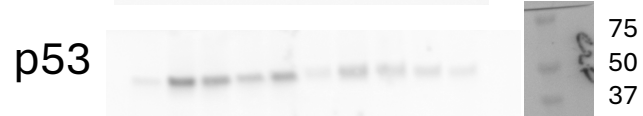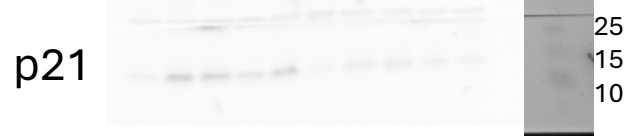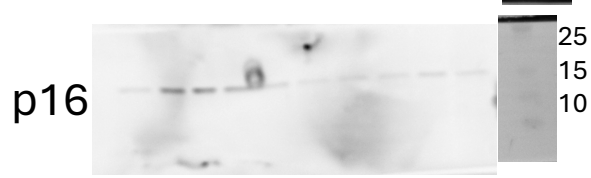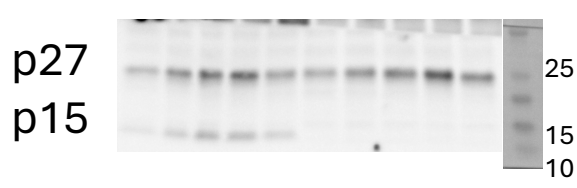

Figure 5C

pRB S807

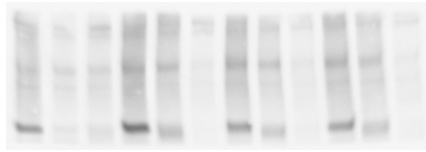

250  
150  
100

RB

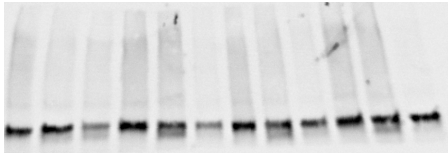

250  
150  
100

Figure 5D

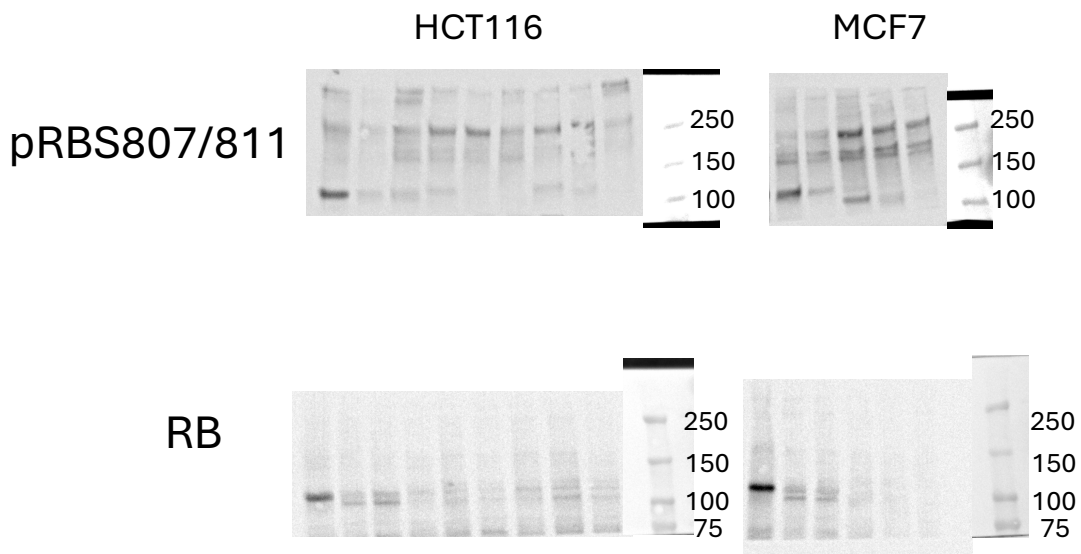

Figure 5E

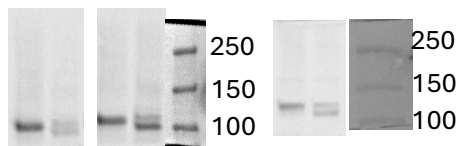

Figure 6C

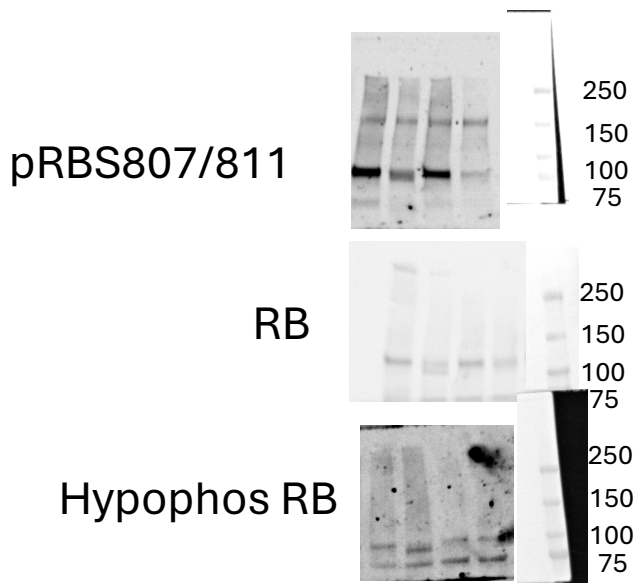

Figure 6D

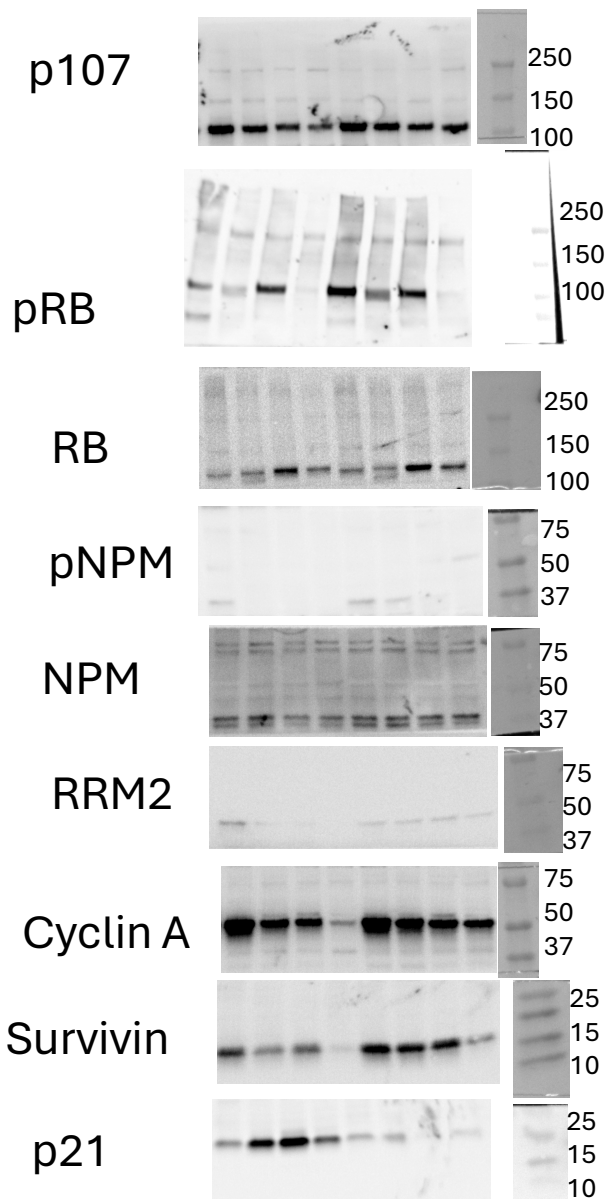



Figure S3A

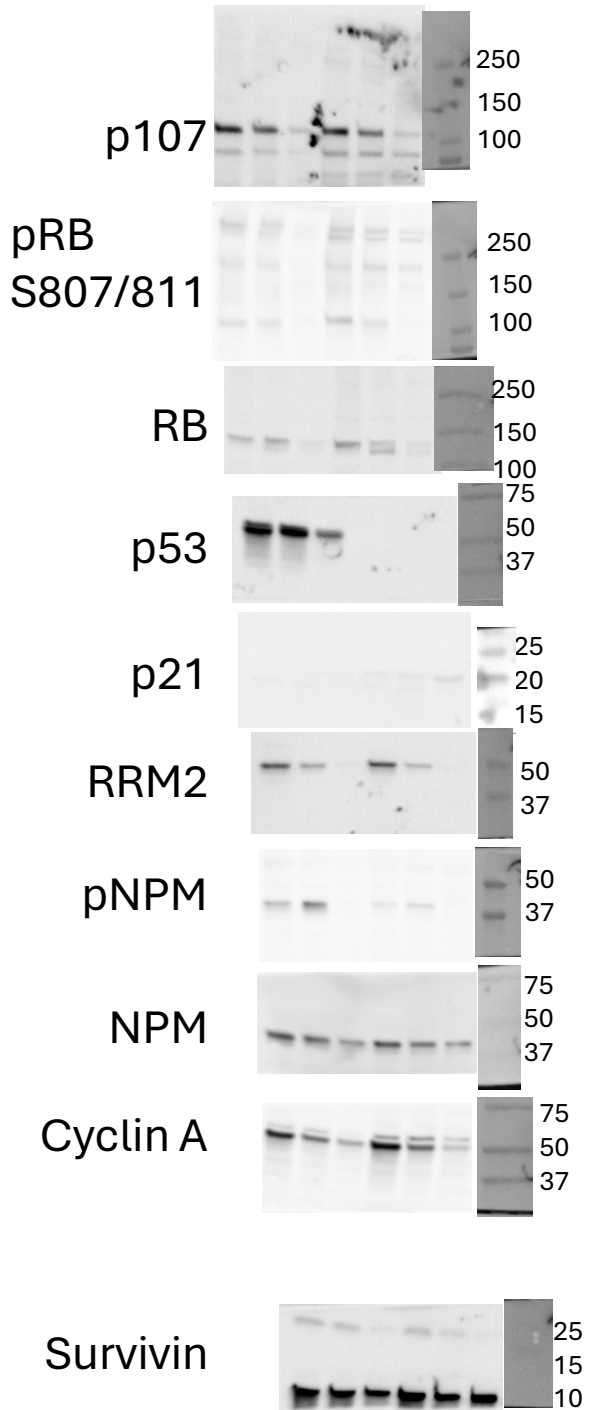

Figure S3B

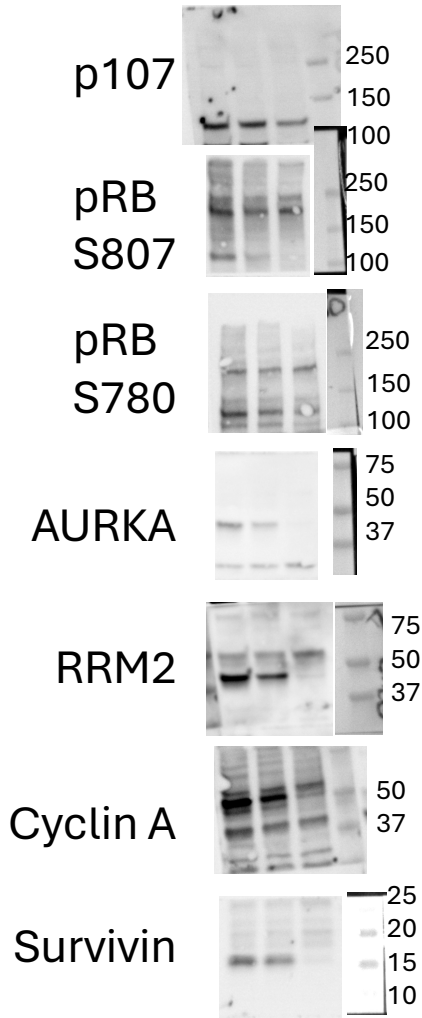

Figure S3C

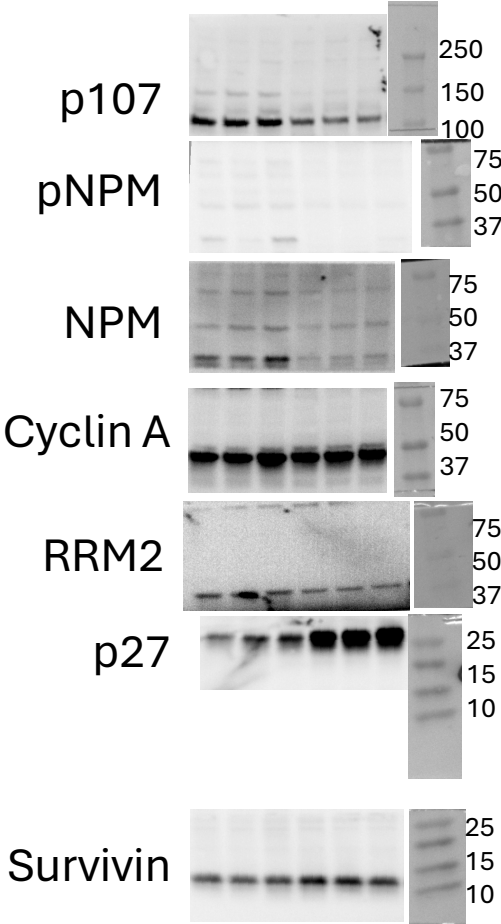

Figure S4

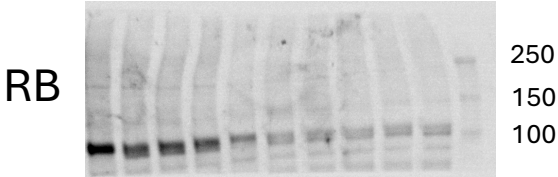

Figure S5A

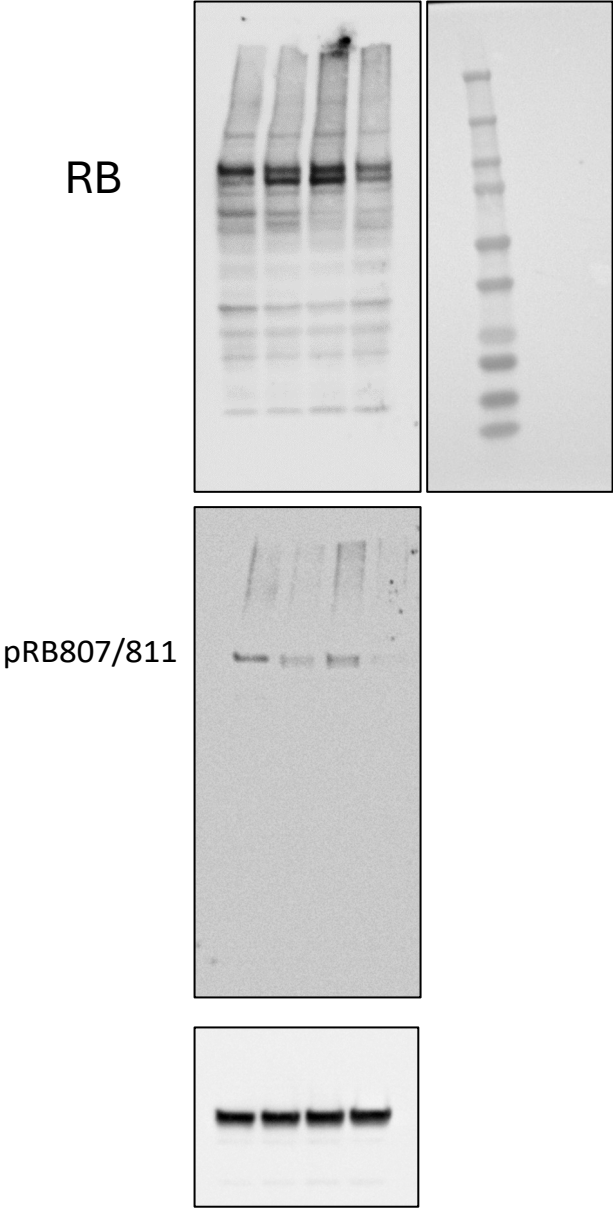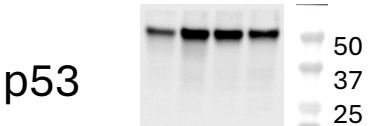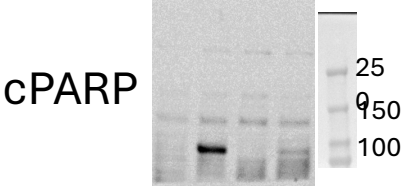

Figure S5B

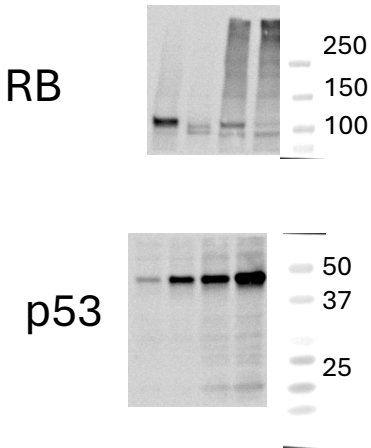

Figure S5C

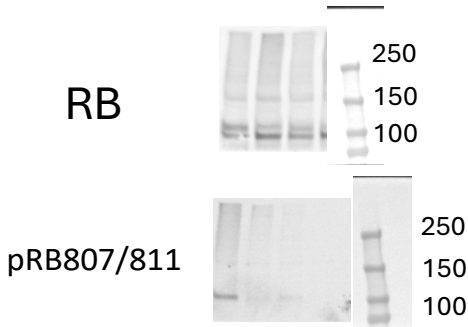

Supplement: 41419_2024_7204_MOESM2_ESM.pdf [file 41419_2024_7204_MOESM2_ESM.pdf]
